# Supplementary material for: HDG11 upregulates cell-wall-loosening protein genes to promote root elongation in Arabidopsis
Source: PubMed Central journal article supplement (PMC4112634; doi:10.1093/jxb/eru202), 2014-05-12
Supplement: supp_eru202_jexbot122051_file001.pdf [file supp_eru202_jexbot122051_file001.pdf]

**Supplemental materials for “ HDG11 upregulates cell wall-loosening protein genes to promote root elongation in Arabidopsis” by Xu *et al.***

**Table S1. The 72 cell-wall related genes up-regulated in *edt1* mutant roots.**

| Locus ID  | Description                        | <i>edt1</i> /WT<br>3D | <i>edt1</i> /WT<br>6D | <i>edt1</i> /WT<br>10D | <i>edt1</i> /WT<br>15D | <i>edt1</i> /WT<br>20D |
|-----------|------------------------------------|-----------------------|-----------------------|------------------------|------------------------|------------------------|
| At1g02810 | pectinesterase                     | 0.94                  | 0.95                  | 1.04                   | 1.02                   | 2.62                   |
| At1g04040 | acid phosphatase                   | 1.27                  | 1.14                  | 0.79                   | 0.99                   | 2.44                   |
| At1g04680 | pectate lyase                      | 0.84                  | 0.83                  | 1.11                   | 1.11                   | 2.54                   |
| At1g05240 | peroxidase                         | 1.67                  | 1.08                  | 0.48                   | 0.73                   | 8.94                   |
| At1g12560 | expansin,EXPA7                     | 1.34                  | 0.91                  | 1.11                   | 1.10                   | 3.20                   |
| At1g20190 | expansin,EXPA11                    | 1.04                  | 1.07                  | 1.06                   | 0.82                   | 3.80                   |
| At1g21310 | extensin-like                      | 1.06                  | 1.31                  | 0.93                   | 1.01                   | 3.36                   |
| At1g33590 | LRR protein                        | 1.25                  | 0.79                  | 1.03                   | 1.01                   | 3.83                   |
| At1g35140 | protein disulfide<br>isomerase     | 1.12                  | 0.94                  | 0.96                   | 1.07                   | 0.85                   |
| At1g41830 | multi-copper oxidase               | 1.11                  | 1.01                  | 0.85                   | 0.85                   | 2.55                   |
| At1g53840 | pectinesterase                     | 0.97                  | 0.94                  | 1.08                   | 0.99                   | 2.65                   |
| At1g54970 | extensin-like                      | 2.10                  | 0.94                  | 0.71                   | 0.76                   | 5.93                   |
| At1g58370 | (1,4)-beta-xylan<br>endohydrolase  | 1.76                  | 0.88                  | 0.57                   | 0.74                   | 2.33                   |
| At1g62770 | pectin methylesterase<br>inhibitor | 1.29                  | 0.91                  | 0.90                   | 1.03                   | 5.03                   |
| At1g62980 | expansin,EXPA18                    | 1.57                  | 0.98                  | 0.54                   | 0.77                   | 3.67                   |
| At1g65310 | xyloglucosyl transferase           | 1.63                  | 1.27                  | 0.69                   | 1.13                   | 5.52                   |
| At1g67750 | pectate lyase                      | -                     | -                     | -                      | -                      | 3.72                   |
| At1g69530 | expansin,EXPA1                     | 0.90                  | 0.68                  | 2.17                   | 0.85                   | 1.55                   |
| At1g75750 | gibberellin-regulated<br>protein 1 | 0.77                  | 0.96                  | 0.63                   | 0.84                   | 3.42                   |
| At1g75830 | PDF1.1                             | 136                   | -                     | -                      | -                      | -                      |
| At1g76930 | extensin-like                      | 0.94                  | 1.11                  | 1.77                   | 1.57                   | 2.92                   |
| At1g78830 | lectin family protein              | 2.22                  | 1.03                  | 0.79                   | 1.13                   | 7.41                   |
| At1g80240 | expressed protein                  | 0.82                  | 0.74                  | 0.51                   | 0.65                   | 3.91                   |
| At2g03090 | expansin,EXPA15                    | 0.95                  | 1.61                  | 2.58                   | 0.89                   | 1.96                   |
| At2g06850 | xyloglucosyl transferase           | 0.87                  | 0.87                  | 0.78                   | 0.85                   | 2.54                   |
| At2g20750 | expansin,EXPB1                     | 1.26                  | 1.20                  | 0.81                   | 1.20                   | 3.52                   |
| At2g24980 | extensin-like                      | 1.20                  | 1.20                  | 0.89                   | 1.32                   | 2.89                   |
| At2g26010 | PDF1.3                             | 31.0                  | -                     | -                      | -                      | -                      |
| At2g39700 | expansin,EXPA4                     | 1.35                  | 0.90                  | 1.25                   | 0.81                   | 2.24                   |
| At2g43150 | extensin-like                      | 0.95                  | 1.10                  | 1.10                   | 0.98                   | 2.01                   |

|           |                                      |      |      |       |      |       |
|-----------|--------------------------------------|------|------|-------|------|-------|
| At2g44450 | Glycosyl hydrolase                   | 1.01 | 0.85 | 1.07  | 0.93 | 3.08  |
| At2g45220 | pectinesterase                       | 1.47 | 1.02 | 0.60  | 0.95 | 14.44 |
| At3g07010 | pectate lyase                        | 1.09 | 0.90 | 0.72  | 0.64 | 2.57  |
| At3g10720 | pectinesterase                       | 0.99 | 0.69 | 0.61  | 1.05 | 2.28  |
| At3g16240 | delta tonoplast integral protein     | 1.14 | 0.62 | 0.65  | 0.68 | 5.72  |
| At3g24670 | pectate lyase                        | 1.41 | 1.00 | 0.49  | 0.87 | 2.96  |
| At3g28550 | extensin-like                        | 0.93 | 1.23 | 0.84  | 1.36 | 2.94  |
| At3g29030 | expansin,EXPA5                       | 3.47 | 4.69 | 14.93 | 9.30 | 10.97 |
| At3g45960 | expansin family protein (EXPL3)      | 0.65 | 0.81 | 1.62  | 0.97 | 6.35  |
| At3g45970 | expansin family protein (EXPL1)      | 0.87 | 1.00 | 1.30  | 1.07 | 2.64  |
| At3g54580 | extensin-like                        | 1.10 | 1.10 | 0.81  | 1.25 | 4.47  |
| At3g54590 | extensin-like                        | 1.16 | 1.17 | 0.85  | 1.16 | 3.27  |
| At3g62020 | germin-like protein (GLP10)          | 1.79 | 0.91 | 0.56  | 0.83 | 2.18  |
| At3g62680 | extensin-like                        | 1.59 | 0.93 | 0.77  | 0.93 | 8.68  |
| At4g00080 | pectin methylesterase inhibitor      | 0.95 | 0.75 | 0.70  | 0.84 | 3.00  |
| At4g08400 | extensin-like                        | 1.25 | 1.19 | 0.86  | 1.23 | 2.22  |
| At4g08410 | extensin-like                        | 1.38 | 0.91 | 0.72  | 1.08 | 3.62  |
| At4g08950 | phosphate-responsive protein         | 0.89 | 0.72 | 0.91  | 0.64 | 2.90  |
| At4g20830 | oxidase precursor                    | 1.36 | 0.85 | 0.78  | 0.85 | 3.51  |
| At4g24780 | pectate lyase                        | 1.17 | 0.84 | 1.15  | 0.74 | 2.06  |
| At4g28250 | beta-expansin,EXPB3                  | 4.37 | 1.66 | 2.21  | 1.28 | 10.95 |
| At4g30270 | MERI-5 protein                       | 0.80 | 0.58 | 0.74  | 0.77 | 4.10  |
| At4g38770 | extensin-like                        | 1.15 | 1.18 | 1.87  | 2.06 | 5.50  |
| At5g04960 | pectinesterase                       | 1.43 | 0.94 | 0.77  | 1.03 | 8.63  |
| At5g06630 | extensin-like                        | 1.16 | 1.30 | 0.94  | 1.18 | 3.10  |
| At5g06640 | extensin-like                        | 1.06 | 1.22 | 0.81  | 1.14 | 5.13  |
| At5g06860 | polygalacturonase inhibiting protein | 0.97 | 0.85 | 0.94  | 1.01 | 4.17  |
| At5g16590 | protein kinase                       | 1.38 | 1.14 | 0.73  | 1.05 | 2.05  |
| At5g17820 | peroxidase 57                        | 1.60 | 1.01 | 0.62  | 1.01 | 5.00  |
| At5g25460 | expressed protein                    | 0.92 | 1.06 | 0.81  | 0.76 | 2.46  |
| At5g42100 | glycosyl hydrolase                   | 0.71 | 0.87 | 0.96  | 1.07 | 1.06  |
| At5g42180 | peroxidase 64                        | 1.07 | 1.18 | 0.78  | 1.09 | 4.56  |
| At5g47500 | pectinesterase                       | 0.65 | 0.59 | 1.00  | 0.87 | 2.62  |
| At5g48900 | pectate lyase                        | 0.98 | 0.85 | 1.17  | 0.90 | 2.85  |
| At5g49080 | extensin-like                        | 1.37 | 1.54 | 0.89  | 1.05 | 4.24  |
| At5g51550 | phosphate-responsive 1               | 1.18 | 0.56 | 0.92  | 1.15 | 2.23  |

|           |                                 |      |      |      |      |      |
|-----------|---------------------------------|------|------|------|------|------|
| At5g57560 | xyloglucosyl transferase        | 1.08 | 0.80 | 1.14 | 0.87 | 4.59 |
| At5g59320 | lipid transfer protein          | 0.53 | 0.86 | 2.03 | 1.21 | 0.27 |
| At5g62340 | pectin methylesterase inhibitor | 1.21 | 0.59 | 0.84 | 1.31 | 2.11 |
| At5g62350 | pectin methylesterase inhibitor | 1.15 | 1.15 | 1.60 | 1.03 | 2.06 |
| At5g62360 | pectin methylesterase inhibitor | 1.15 | 1.15 | 1.60 | 1.03 | 2.06 |
| At5g64260 | phosphate-responsive protein    | 1.17 | 0.99 | 1.02 | 0.97 | 8.68 |

**Table S2. The upregulated cell wall loosening protein genes with HD-binding cis elements in their promoter and the ratio in each category.**

| Gene family                      | SEG genes and their number                                                                                                                                                                                                                                                                                                                    | With HD-binding cis-element                                                                                                                                                                                                  |
|----------------------------------|-----------------------------------------------------------------------------------------------------------------------------------------------------------------------------------------------------------------------------------------------------------------------------------------------------------------------------------------------|------------------------------------------------------------------------------------------------------------------------------------------------------------------------------------------------------------------------------|
| Expansin                         | <b>11</b><br>(At2g20750, At4g28250, At3g45970, At3g45960, At1g69530, At1g20190, At2g03090, At1g62980, At2g39700, At3g29030, At1g12560)                                                                                                                                                                                                        | <b>8 (72.7%)</b><br>(At2g20750, At4g28250, At3g45970, At1g20190, At2g03090, At2g39700, At3g29030, At1g12560)                                                                                                                 |
| Endoxyloglucan transferase (XTH) | <b>13</b><br>(At1g32170, At1g65310, At2g06850, At2g36870, At4g03210, At4g14130, At4g25810, At4g25820, At4g30270, At4g30280, At4g37800, At5g57560, At5g65730)                                                                                                                                                                                  | <b>6 (46.2%)</b><br>(At2g06850, At2g36870, At4g03210, At4g30270, At4g37800, At5g57560)                                                                                                                                       |
| Pectin related enzymes           | <b>20</b><br>(At1g67750, At4g24780, At1g04680, At3g07010, At3g24670, At5g48900; At5g62350, At4g00080, At1g62770, At5g62360, At5g62340; At2g45220, At5g04960, At1g53840, At1g02810, At5g47500, At3g10720 ; At1g65570, At5g14650, At3g07970)                                                                                                    | <b>14 (70%)</b><br>(At1g67750, At4g24780, At1g04680, At3g24670 ; At5g62350, At1g62770, At5g62360; At2g45220, At1g02810, At5g47500, At3g10720 ; At1g65570, At5g14650, At3g07970)                                              |
| Glycosyl hydrolase               | <b>29</b><br>(At3g60130, At3g62740, At2g44450, At2g44480, At1g61820, At3g60140, At1g51470, At1g47600, At1g58370, At3g55430, At3g07320, At5g42100, At4g18340, At2g27500, At4g16260, At4g19810, At5g49360, At1g02640, At5g63800, At5g34940,, At5g15870, At4g02290, At2g32990, At5g35740, At3g10740, At3g28180, At1g23480, At1g60140, At5g53990) | <b>18 (62.1%)</b><br>(At3g60130, At1g61820, At3g60140, At1g51470, At1g47600, At3g07320, At4g18340, At2g27500, At4g19810, At5g49360, At1g02640, At5g63800, At5g34940,, At5g15870, At4g02290, At2g32990, At1g23480, At1g60140) |
| Extensin                         | <b>24</b><br>(At3g09925, At1g76930, At4g38770, At3g09925, At4g02270, At5g05500, At5g06640, At3g54580,                                                                                                                                                                                                                                         | <b>14 (58.3%)</b><br>(At4g38770, At4g02270, At5g05500, At3g54580, At5g49080,                                                                                                                                                 |

|  |                                                                                                                                                                                                                   |                                                                                                          |
|--|-------------------------------------------------------------------------------------------------------------------------------------------------------------------------------------------------------------------|----------------------------------------------------------------------------------------------------------|
|  | At5g49080, At3g49840, At4g08410, At2g33790,<br>At1g21310, At3g54590, At5g06630, At3g28550,<br>At3g06750, At1g76930, At2g24980, At5g49280,<br>At1g28290, At2g47540, At5g09520, At5g09480,<br>At4g08400, At2g43150) | At4g08410, At1g21310, At5g06630,<br>At3g28550, At3g06750, At1g76930,<br>At5g49280, At5g09480, At2g43150) |
|--|-------------------------------------------------------------------------------------------------------------------------------------------------------------------------------------------------------------------|----------------------------------------------------------------------------------------------------------|

**Table S3. Primer sequences of semi-quantitative PCR.**

| Name         | Sequence                  |
|--------------|---------------------------|
| AT5g62360 P1 | ATTCAATCATCATCACTTCCTCAC  |
| AT5g62360 P2 | TGTGAAAGTGCATGATGATTTTACG |
| AT2g36870 P1 | CAAGCTCCAAGTTGGTTCCC      |
| AT2g36870 P2 | CCTGATCTGAATGGCTTCACTG    |
| AT1g48930 P1 | GTTTGGTGGATCATTGTTCCGGC   |
| AT1g48930 P2 | ATCGTTGAGCCTCAAAGAACAAG   |
| At2g32990 P1 | ATGACTGTGATGAATCACCGACA   |
| At2g32990 P2 | ATGCTTCACCGTAGTCAAACCC    |
| At1g54970 P1 | TCCGGTCTACAAAAAGTCTCCAAG  |
| At1g54970 P2 | AACACCACGTGGAAGTATCCCTT   |
| At5g57560 P1 | ATGGCGATCACTTACTTGCTTCCT  |
| At5g57560 P2 | TGGAGACTTTACCAAACAAGTACTC |
| At1g67750 P1 | ATGAGAATGACACTTGTTCACTTG  |
| At1g67750 P2 | GCATCTCCAACAGTCGTCAATTG   |

**Table S4. Primer sequences for ChIP-PCR.**

| Name          | Sequence                  |
|---------------|---------------------------|
| EXPA5_CHIP_P1 | TAGCGGCATAAATCTTCATGAACC  |
| EXPA5_CHIP_P2 | TGAGTACTTGGACCCAACATTGAAT |
| EXPA5_CHIP_P3 | TGTGTTCAAAAACCTTCAACATC   |
| EXPA5_CHIP_P4 | GAAGAACGGTTGGGACTTTTCATA  |
| EXPA5_CHIP_P5 | CGAATACAATGTTGCTCCAATTC   |

|                   |                            |
|-------------------|----------------------------|
| EXPA5_CHIP_P6     | GTTTGAGTGTTTGAGACAGACAAT   |
| EXPB3_CHIP_P1     | ACCGAAATTGAAGAAAAGCTTGTC   |
| EXPB3_CHIP_P2     | CAGAAAATTCGAATCTCACACCAA   |
| At2g32990_ChIP_P1 | AGAATATCGAGTAGGATTTTTAATG  |
| At2g32990_ChIP_P2 | CGTTTATACACTTTCATTATACTGT  |
| At2g32990_ChIP_P3 | AATAGTTAGGCCCACTTTGAAAATG  |
| At2g32990_ChIP_P4 | TTGGCAGTAATTCAGGTTTCCG     |
| At2g32990_ChIP_P5 | ACCCATTTAGATCCATCCTATAT    |
| At2g32990_ChIP_P6 | GCTGGGTTCACTGTTACAAATTAT   |
| At5g62360_ChIP_P1 | ATGTTTGACAATTCTCTTTCACACC  |
| At5g62360_ChIP_P2 | TGTCACC GTTTTCAAGTAGTTATGT |
| At5g62360_ChIP_P3 | GGTCGACATCTTTTAATCTTTAGTG  |
| At5g62360_ChIP_P4 | ACAATCGCAAATATGAAACCCAAA   |
| At2g36870_ChIP_P1 | ATTCAGCATCGTCCTTCCGGG      |
| At2g36870_ChIP_P2 | CCGAACCTCTTTTGTCTCACGG     |
| At2g36870_ChIP_P3 | AGTTTATTGAGTTAAGTGGATTCCG  |
| At2g36870_ChIP_P4 | CGGCATATGTATTGCTTACTAGTTA  |
| At1g54970_ChIP_P1 | TGAATGCACATGTTTAAAGATTCCG  |
| At1g54970_ChIP_P2 | GGAGGCCACATAAAGTCCAATATA   |
| At5g57560_ChIP_P1 | CTTGTTTCATGGGCTATCATCTC    |
| At5g57560_ChIP_P2 | AGGGTTTCGACACCTGACAAGTT    |
| At1g67750_ChIP_P1 | TTTAGCGGGAAAACGGAATTTTAC   |
| At1g67750_ChIP_P2 | ACAAATAGACTTAAATCTTATTTCC  |

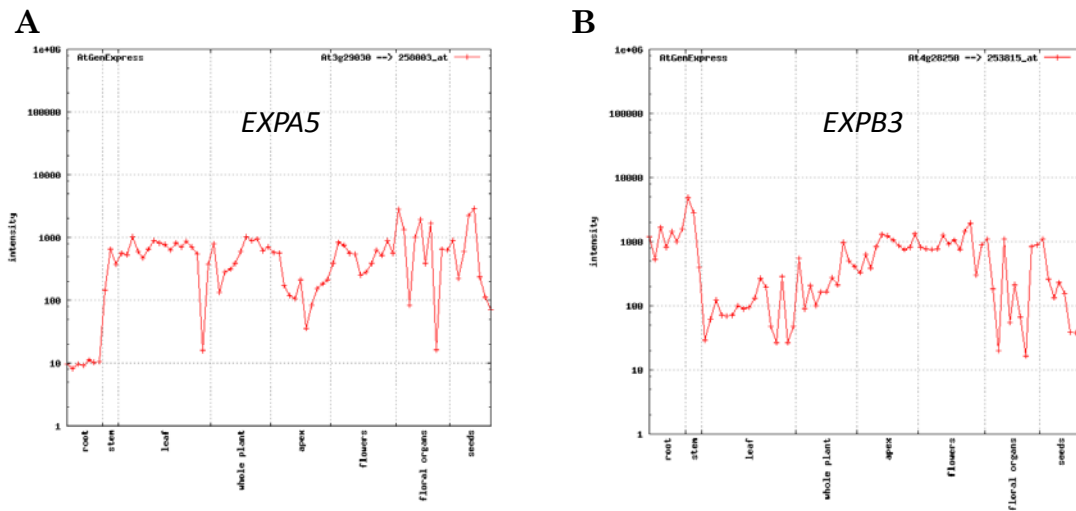

**Figure S1. *EXPA5* (A) and *EXPB3* (B) expression pattern by AtGenExpress Visualization Tool (AVT).**

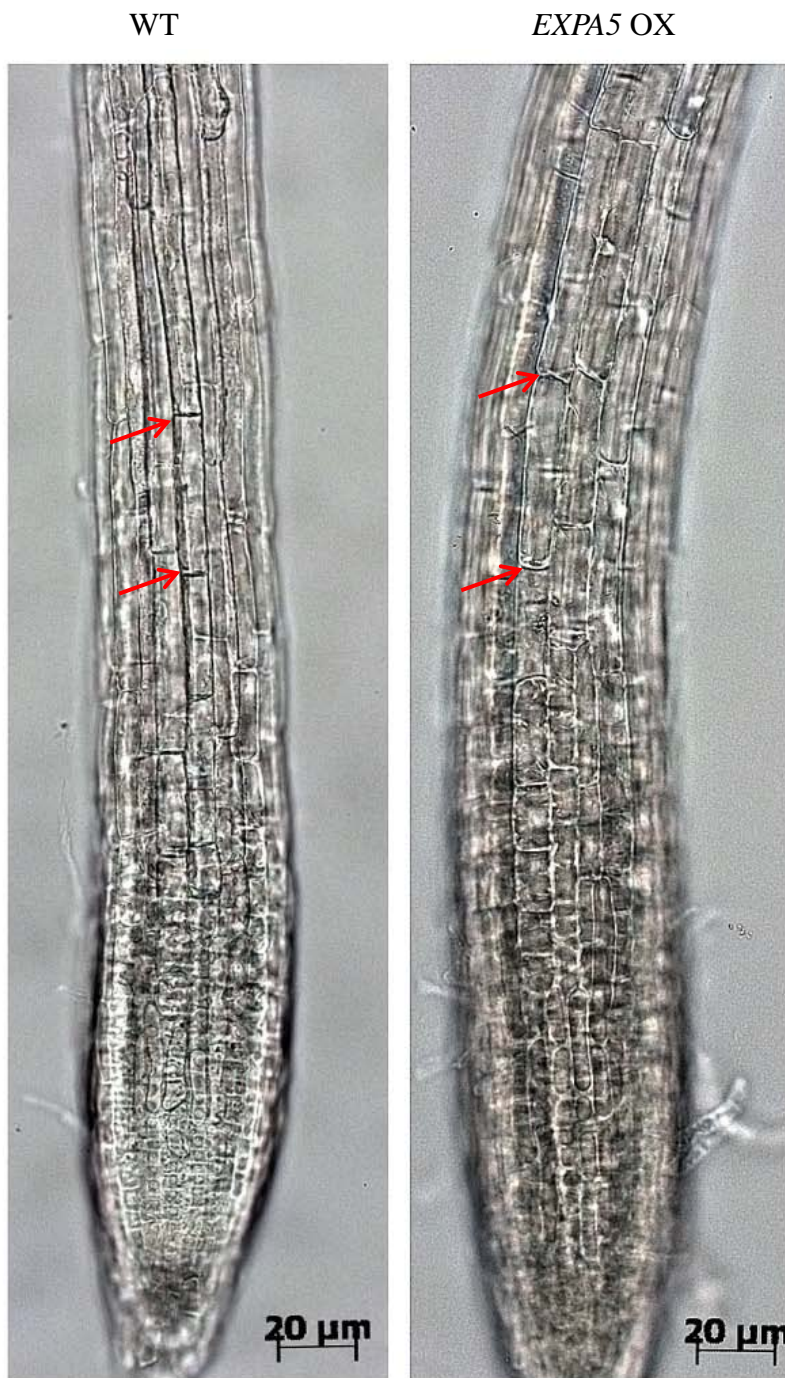

**Figure S2. The cells in elongation zone of *EXPA5*-overexpressing line is longer than that of the wild type. The cell between two arrows is the fifth cell of elongation zone.**

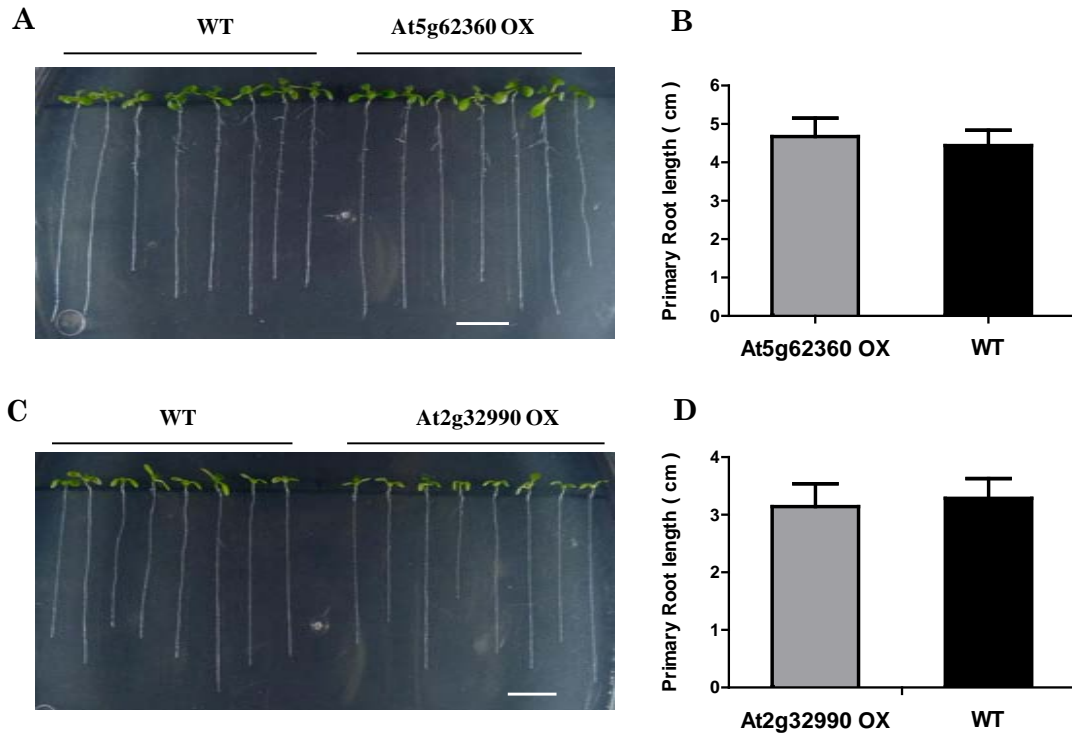

**Figure S3. The root architecture of PME1 (At5g62360) or CEL (At2g32990) overexpression transgenic plants.**

- A. The primary root of 8-d-old wild type and PME1 over-expression transgenic plants on MS medium.
- B. The primary root length of plants shown in (A). Presented are means  $\pm$  SD (n = 3, >50 seeds per replicate experiment). There was no significant difference between wild type and transgenic plants.
- C. The primary root of 8-d-old wild type and CEL over-expression transgenic plants on MS medium.
- D. The primary root length of plants shown in (C). Presented are means  $\pm$  SD (n = 3, >50 seeds per replicate experiment). There was no significant difference between wild type and transgenic plants.
